# Supplementary material for: Molecular phylogeny of porcelain crabs (Porcellanidae: Petrolisthes and allies) from the south eastern Pacific: the genera Allopetrolisthes and Liopetrolisthes are not natural entities
Source: PeerJ journal article supplement (doi:10.7717/peerj.1805), 2016-03-10

## A. Habit (dorsal view)

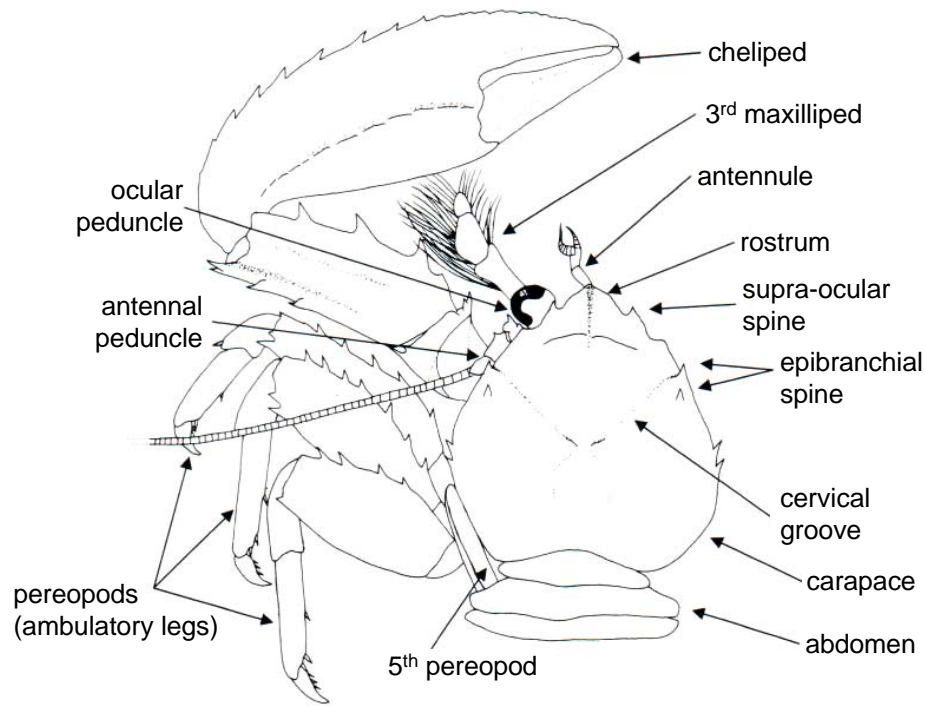

## C. Antenna

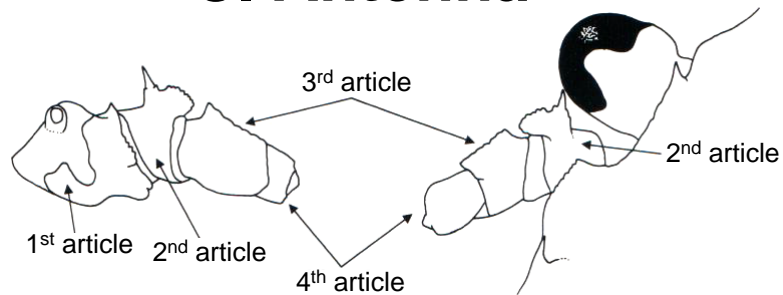

## B. Pereopod

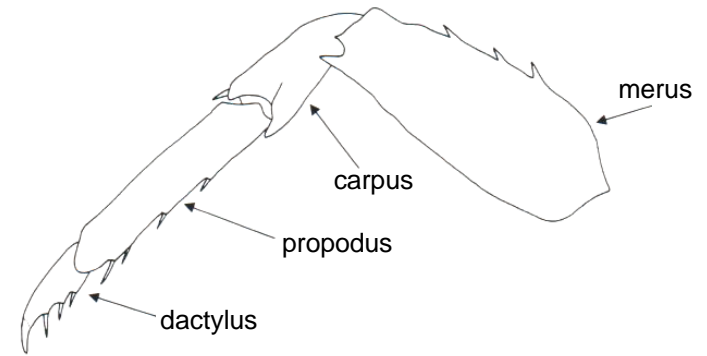

## D. Cheliped

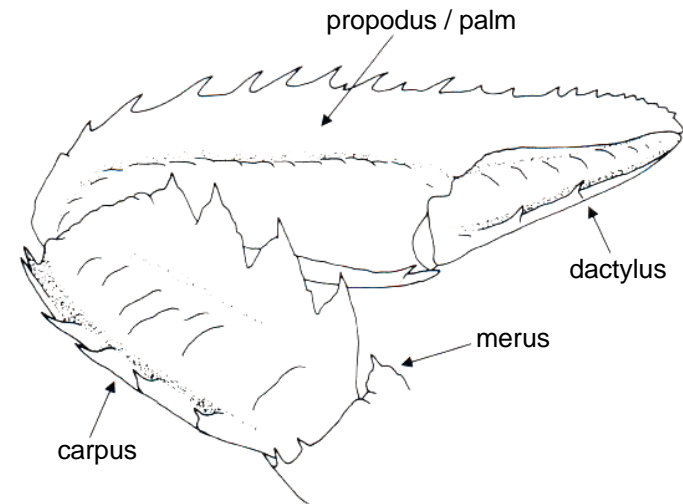

Supplement: SupplFigure01.pdf [file SupplFigure01.pdf]
